# Supplementary material for: Convergent and divergent genetic changes in the genome of Chinese and European pigs
Source: PubMed Central journal article supplement (PMC5561219; doi:10.1038/s41598-017-09061-z), 2017-08-17
Supplement: 41598_2017_9061_MOESM1_ESM.pdf [file 41598_2017_9061_MOESM1_ESM.pdf]

# **Convergent and divergent genetic changes in the genome of Chinese and European pigs**

Jing Wang<sup>1,2+</sup>, Huiying Zou<sup>2,7+</sup>, Lei Chen<sup>3</sup>, Xi Long<sup>3</sup>, Jing Lan<sup>3</sup>, Wenjie Liu<sup>2</sup>, Li Ma<sup>2</sup>, Chao Wang<sup>4</sup>, Xinyu Xu<sup>5</sup>, Liming Ren<sup>2</sup>, Zhenglong Gu<sup>6</sup>, Ning Li<sup>2</sup>, Xiaoxiang Hu<sup>2</sup>, Yaofeng Zhao<sup>2\*</sup> & Yiqiang Zhao<sup>1,2\*</sup>.

## **Supplemental Information**

### **Supplementary Figures S1-S12**

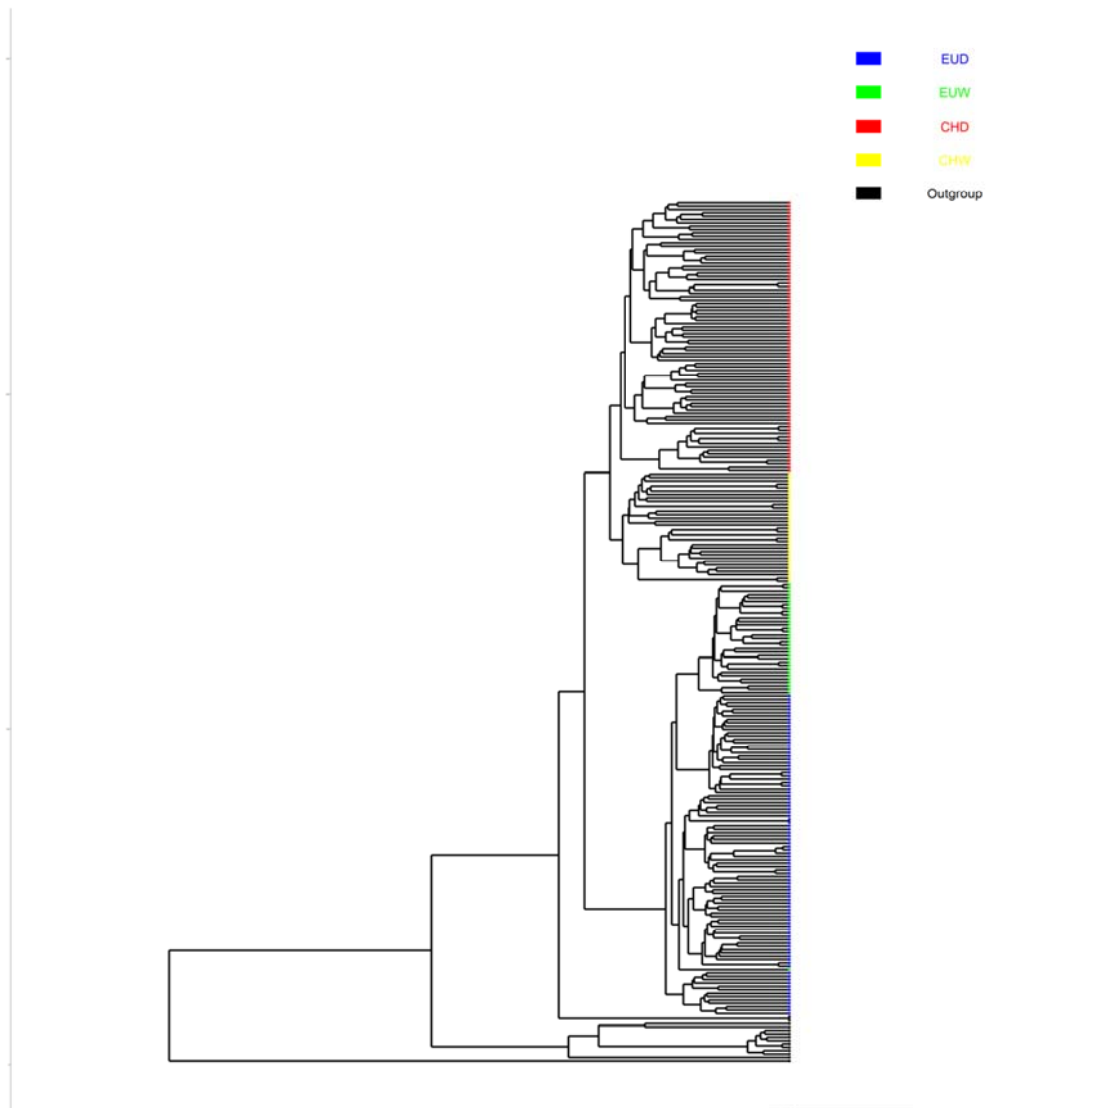

**Supplementary Figure 1. Neighbor-joining tree in whole genome regions.** Neighbor-joining tree is based on an identity-by-state (IBS) distance matrix, using the data in the whole genome regions. The CHD include Mini-pigs.

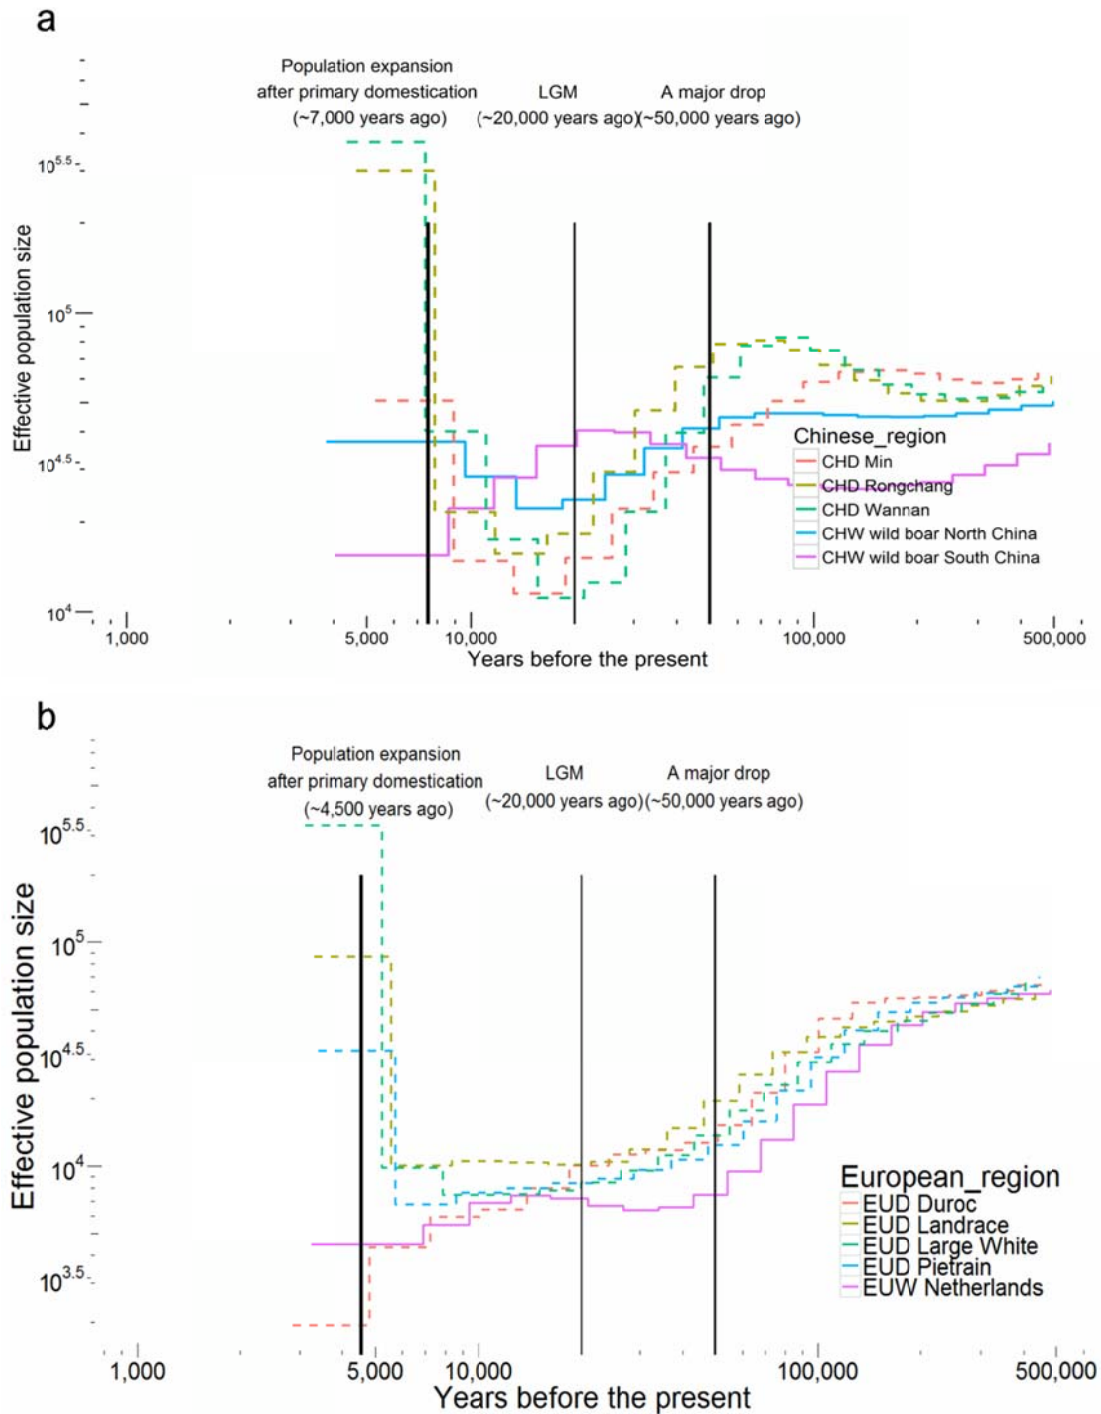

**Supplementary Figure 2. Demographic history of domestic breeds and wild boars in China and Europe on phased data.** 2 individuals from each breeds were used to infer the demographic history using a hidden Markov model approach as implemented in multiple sequentially Markovian coalescence based on SNP distribution. The Demographic history is inferred based on phased data. **(a)**, Demographic history of domestic breeds and wild boars in China. **(b)**, Demographic history of domestic breeds and wild boars in Europe.

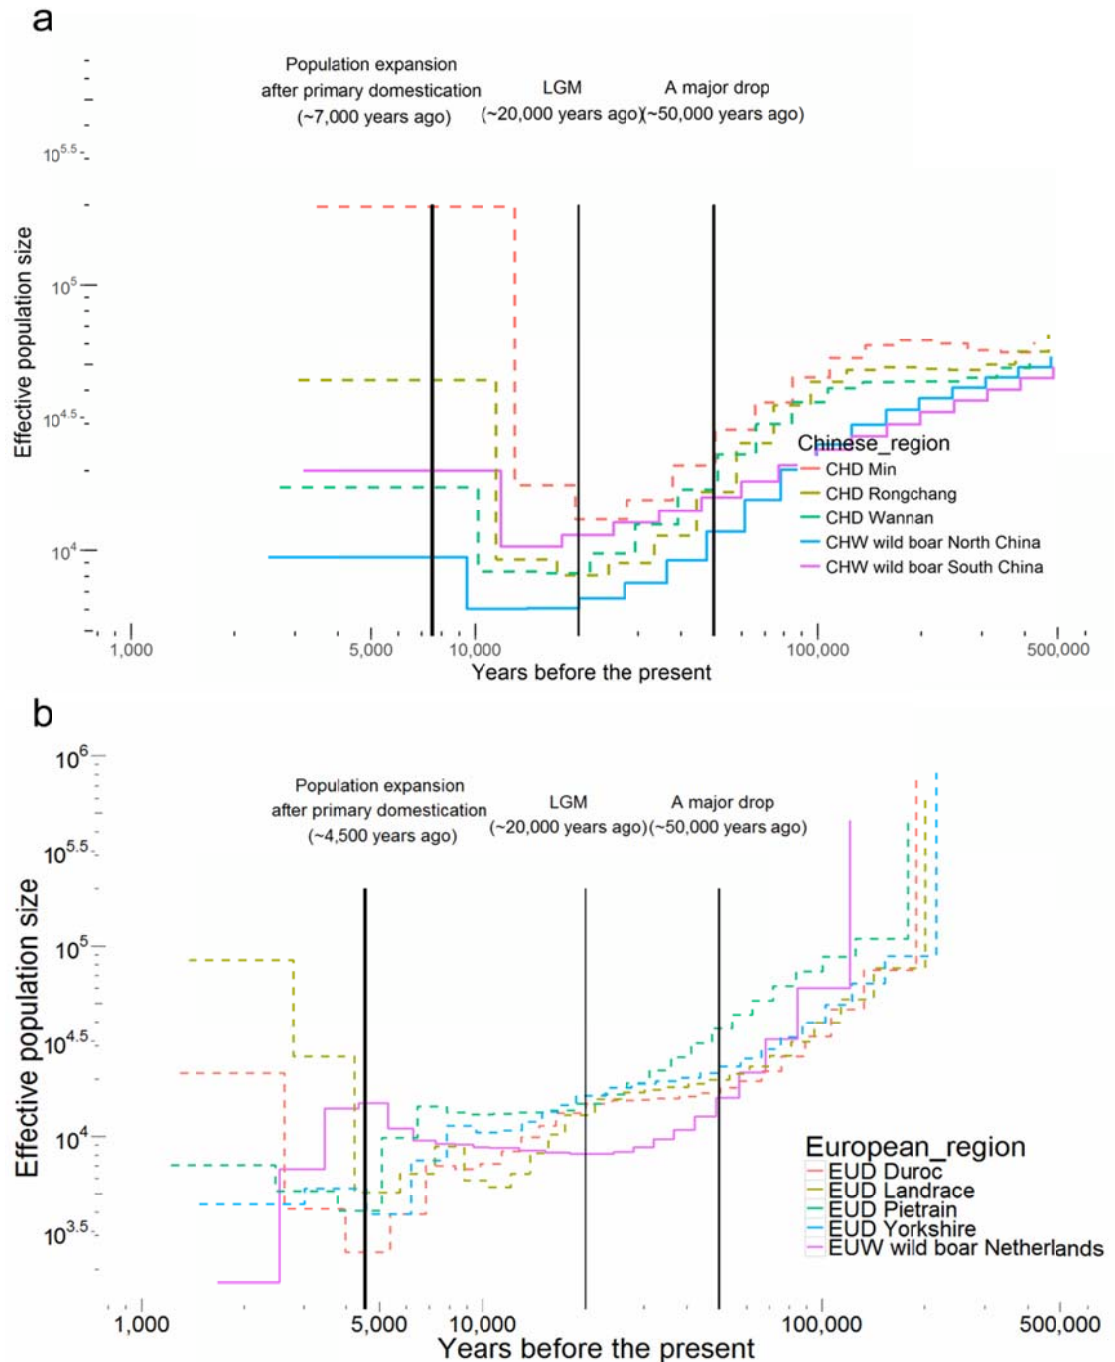

**Supplementary Figure 3. Demographic history of domestic breeds and wild boars in China and Europe on unphased data.** 2 individuals from each breeds were used to infer the demographic history using a hidden Markov model approach as implemented in multiple sequentially Markovian coalescence based on SNP distribution. The Demographic history is inferred based on unphased data. **(a)**, Demographic history of domestic breeds and wild boars in China. **(b)**, Demographic history of domestic breeds and wild boars in Europe.

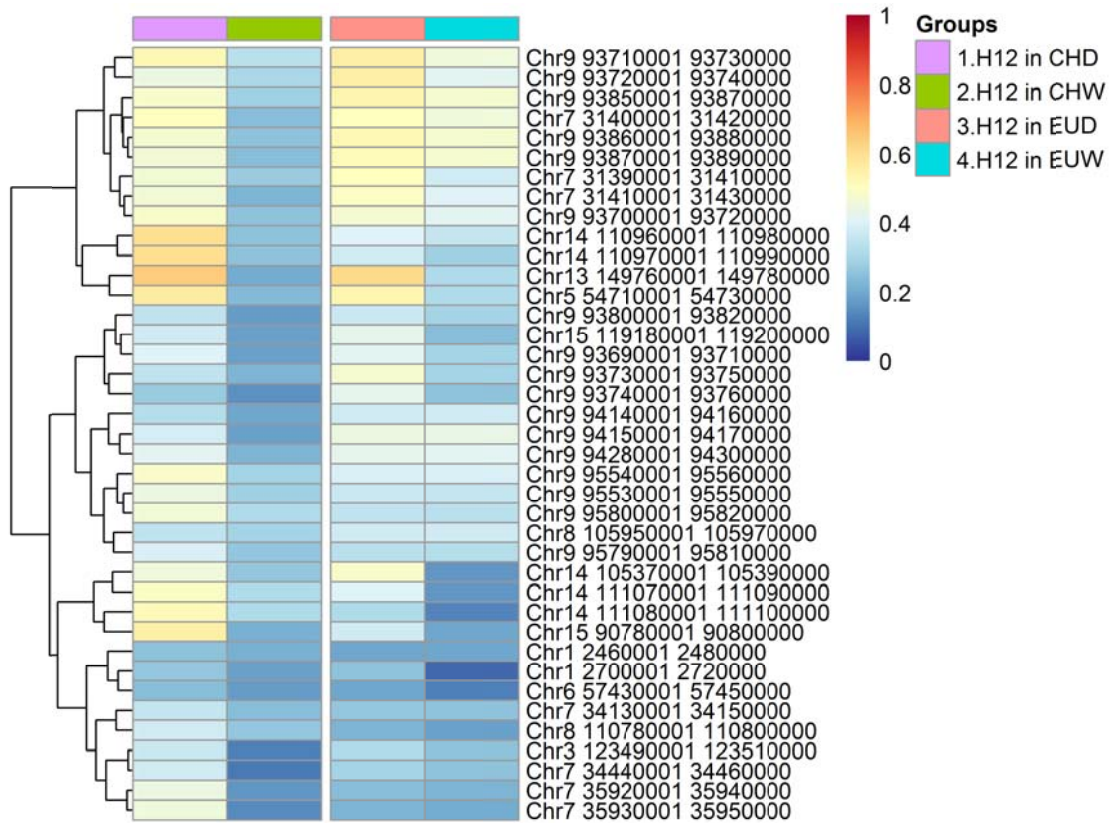

**Supplementary Figure 4. The H12 in unidirectional selection regions for each group.** Heatmap from hierarchical clustering of the H12 value in the 39 unidirectional regions for each group. Heat-map colors (right) indicate the H12 value.

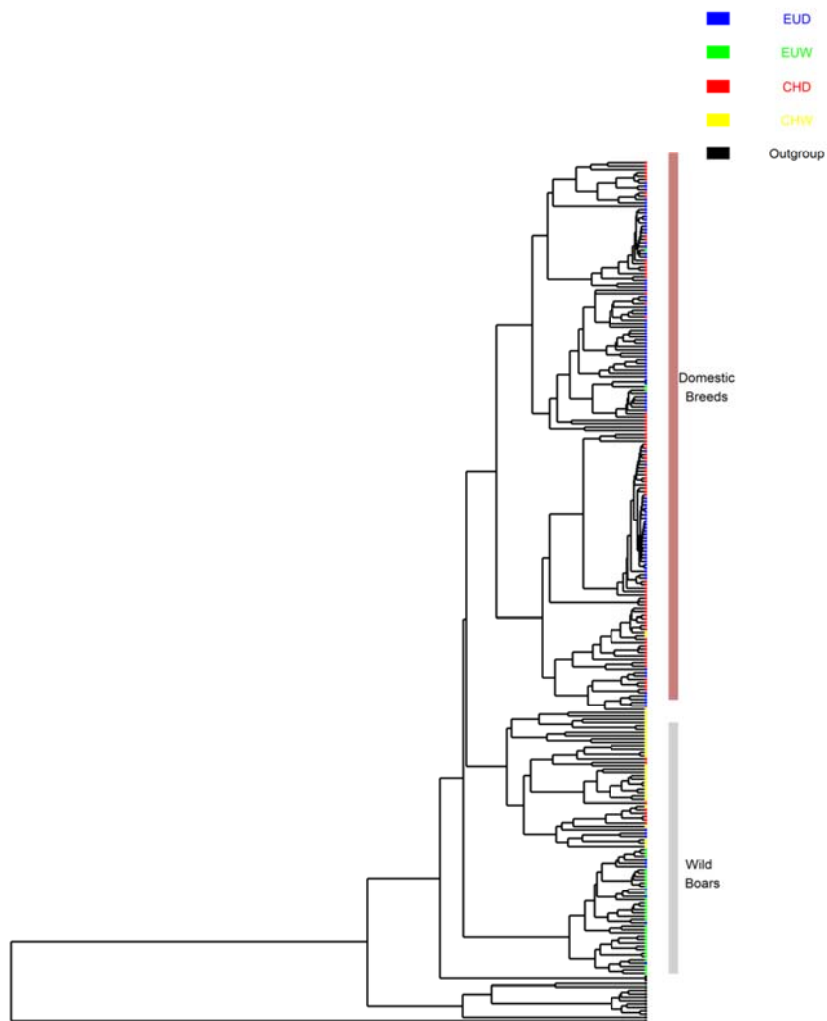

**Supplementary Figure 5. Neighbor-joining tree in unidirectional selection regions.** Neighbor-joining tree is based on an identity-by-state (IBS) distance matrix, using the data in unidirectional selection regions only. The CHD include Mini-pigs.

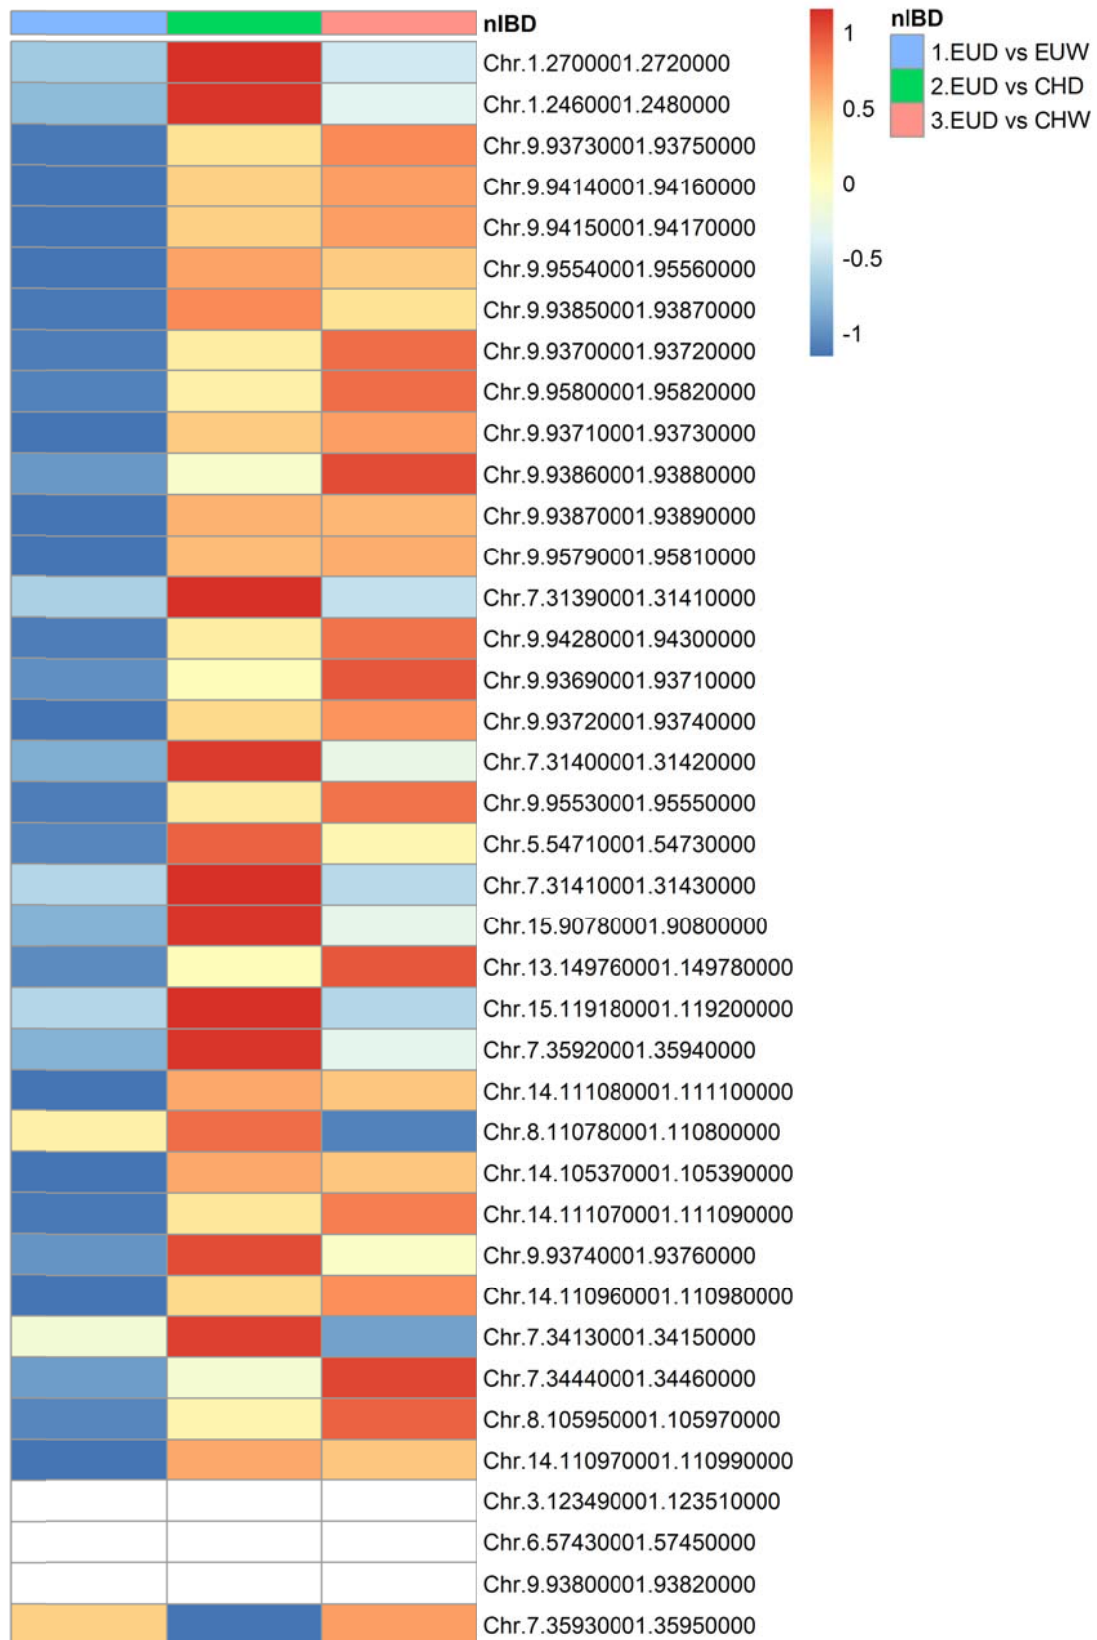

**Supplementary Figure 6. Pairwise nIBD between EUD and the other three groups in unidirectional selection regions.** Heatmap from pairwise nIBD in the 39 unidirectional regions. The heatmap was plotted scaled by row.

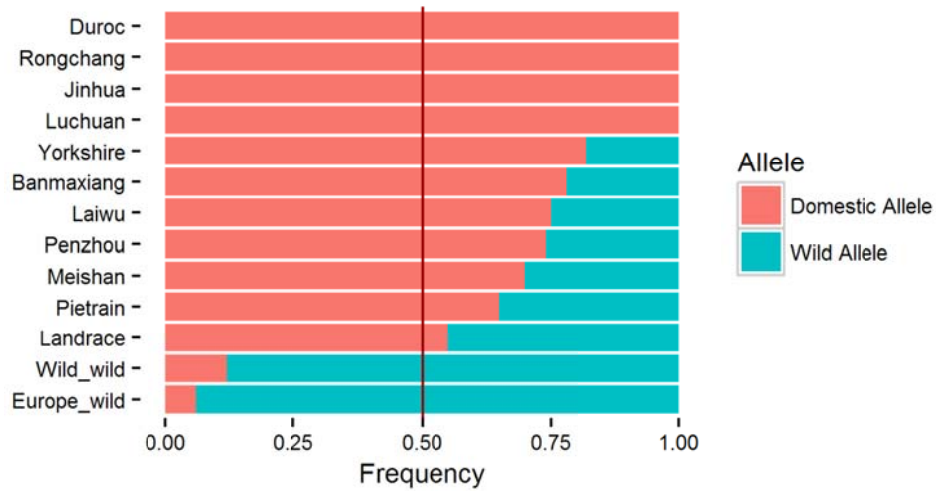

**Supplementary Figure 7. The average frequency of the 5 non-synonymous substitutions in each breed.** The five variants correspond to mutations of amino acids (P419T, K616Q, G717C, F803L, and T839P) in *AHR*.

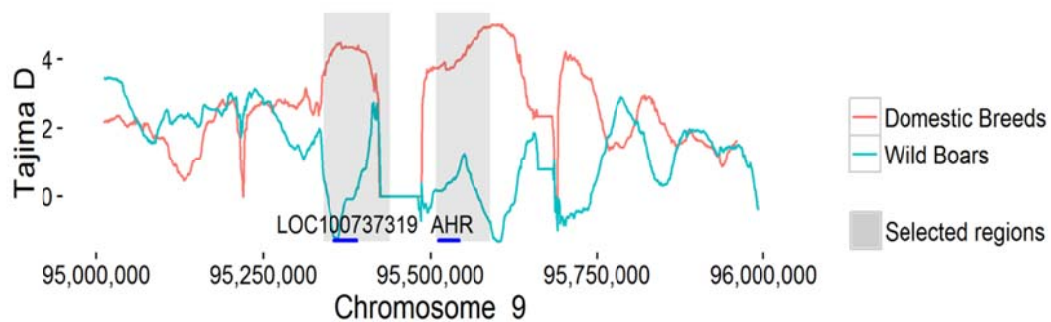

**Supplementary Figure 8. Genomic regions with strong unidirectional selection signals in European domestic breeds and European wild boars.**



Tajima's D (red and blue lines for domestic breeds and wild boars, respectively) are plotted using a 20 kb sliding window.

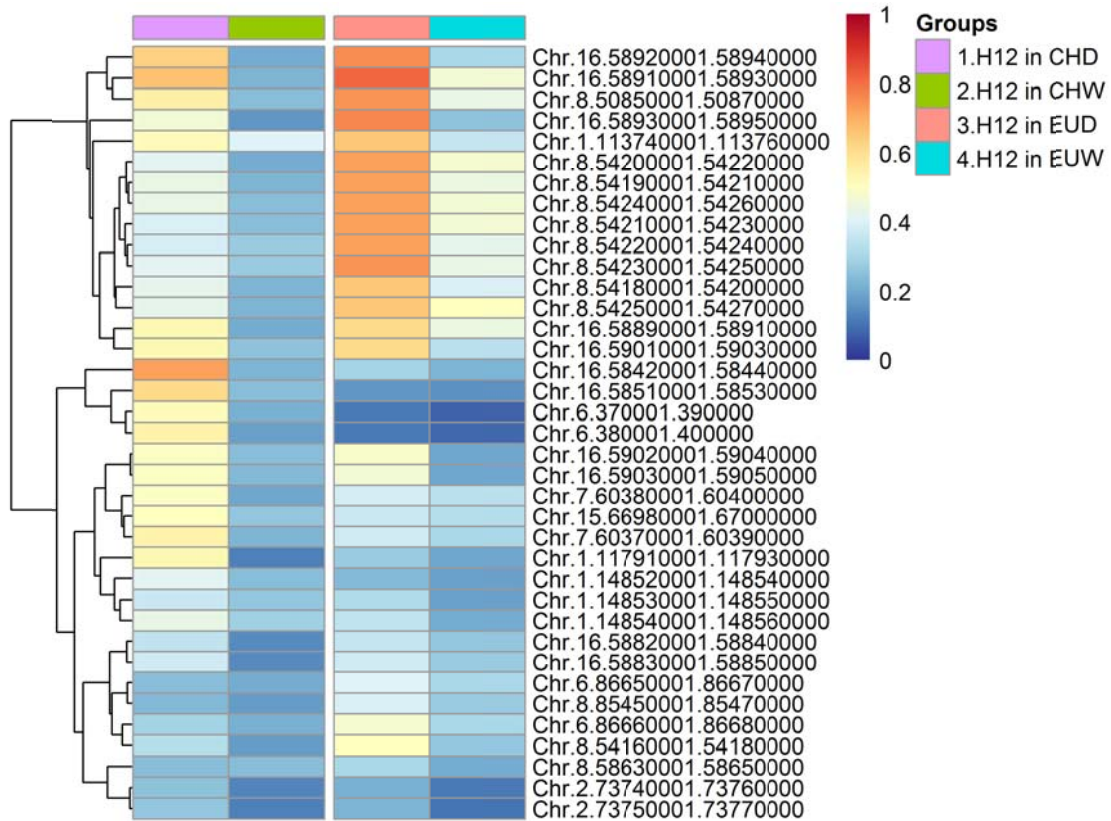

**Supplementary Figure 9. The H12 in unidirectional selection regions for each group.** Heatmap from hierarchical clustering of the H12 value in the 37 bidirectional regions for each group. Heat-map colors (right) indicate the H12 value.

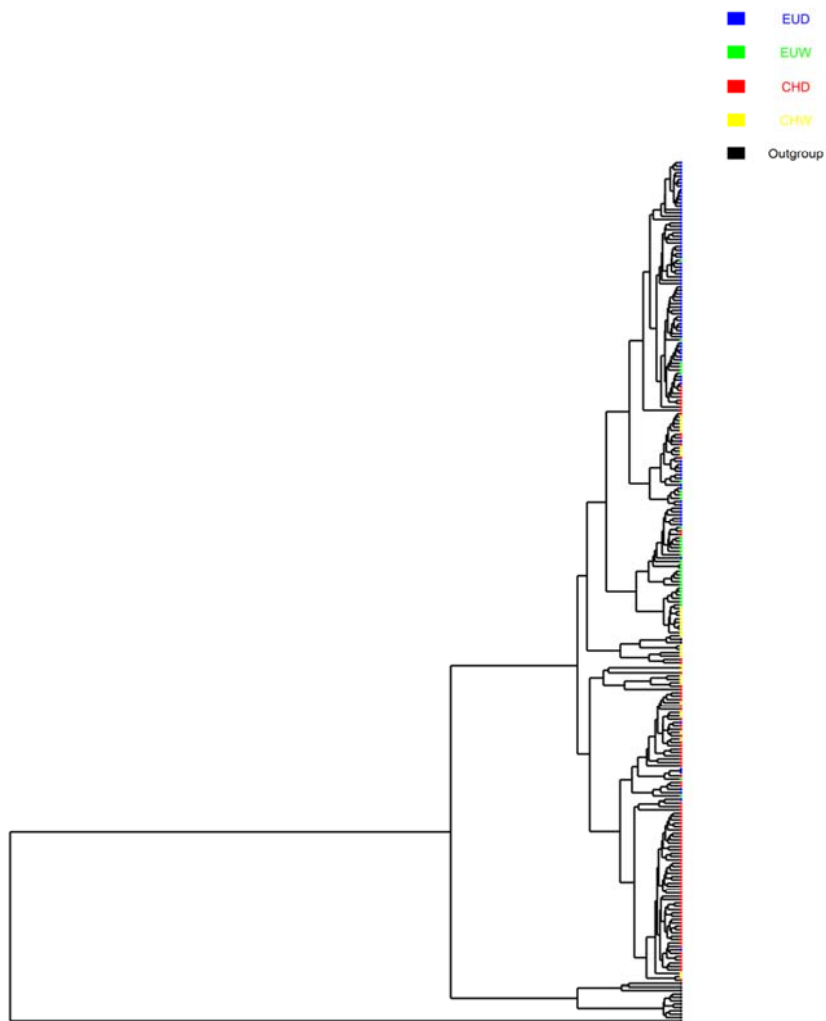

**Supplementary Figure 10. Neighbor-joining tree in bidirectional selection regions.** Neighbor-joining tree is based on an identity-by-state (IBS) distance matrix, using the data in unidirectional selection regions only. The CHD include Mini-pigs.

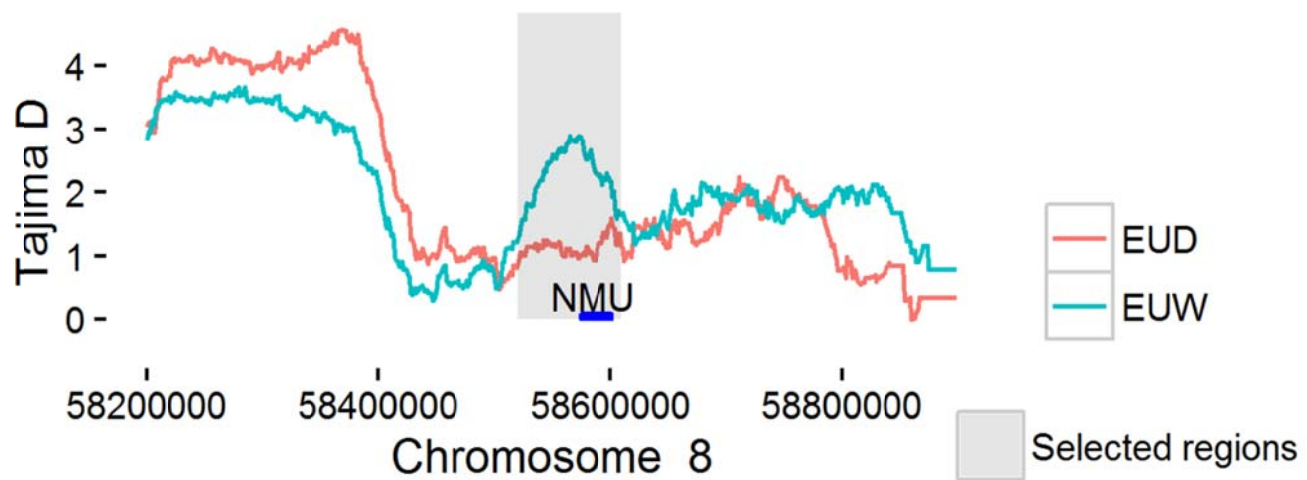

**Supplementary Figure 11. Genomic regions with strong bidirectional selection signals in European domestic breeds and European wild boars.** Tajima's D (red and blue lines for European domestic breeds and European wild boars, respectively) are plotted using a 20 kb sliding window.

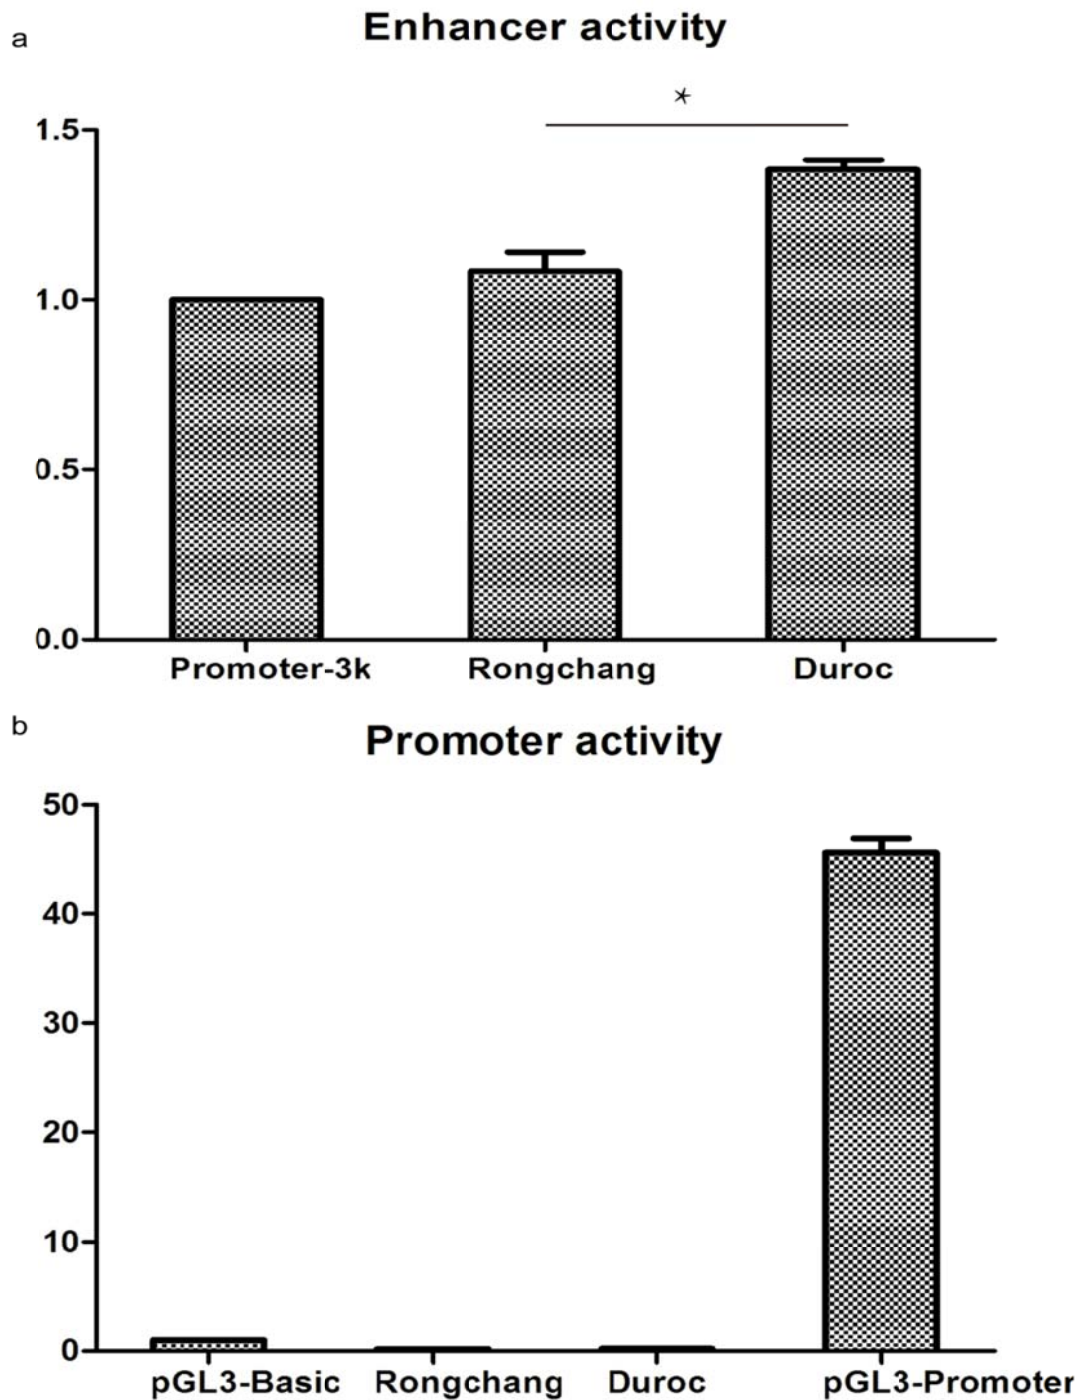

**Supplementary Figure 12. Validation the effect of the mutations in *NMU* using pig fibroblast cells. (a), Luciferase assay testing the enhancer activity for different allele in the intron of the *NMU* in pig fibroblast cells. (b), Luciferase assay testing the promoter activity for different allele in the intron of the *NMU* in pig fibroblast cells.**
